# Supplementary material for: Inhibition of ZEB1 leads to inversion of metastatic characteristics and restoration of paclitaxel sensitivity of chronic chemoresistant ovarian carcinoma cells
Source: PubMed Central journal article supplement (PMC5725108; doi:10.18632/oncotarget.20107), 2017-08-10
Supplement: oncotarget-08-99482-s001.pdf [file oncotarget-08-99482-s001.pdf]

# Inhibition of zeb1 leads to inversion of metastatic characteristics and restoration of paclitaxel sensitivity of chronic chemoresistant ovarian carcinoma cells

## SUPPLEMENTARY MATERIALS

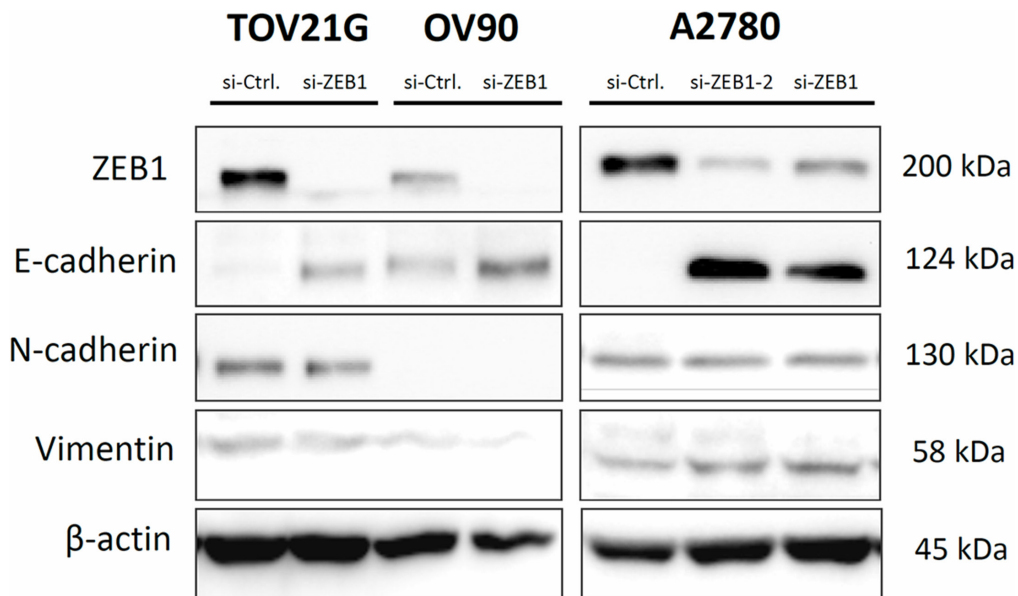

Supplementary Figure 1: Depletion of ZEB1 in TOV-21G, OV90, and A2780 cells and influence on expression of E-cadherin as an epithelial marker, and vimentin and N-cadherin as mesenchymal markers.

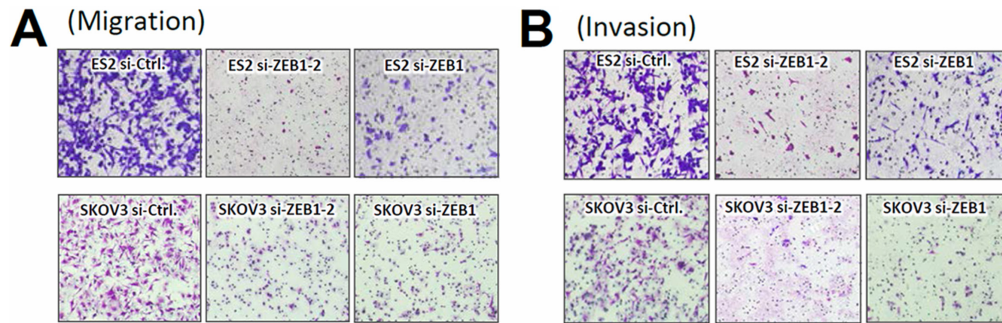

**Supplementary Figure 2: The representative images of the decreased cell migration and invasion by depletion of ZEB1 in ES-2 cells.**

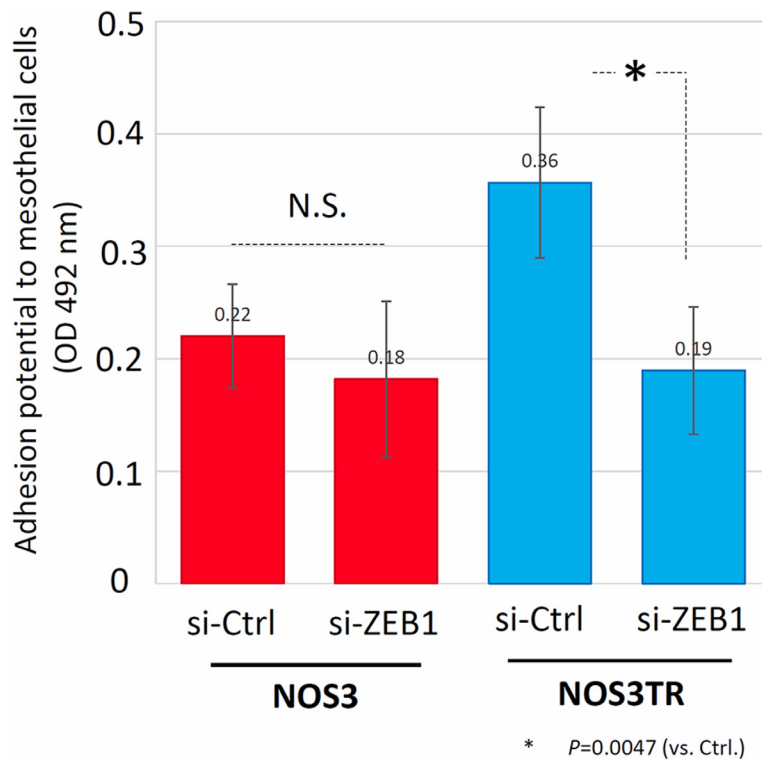

**Supplementary Figure 3: The effect of ZEB1 silencing on the adhesion potential of either NOS3 or NOS3TR cells to HPMCs. Asterisks shows statistically significant ( $P < 0.05$ ).**
